# Supplementary material for: The Effectiveness of Online Education in Basic Medical Sciences Courses during the COVID-19 Pandemic in Saudi Arabia: Cross-Sectional Study
Source: MDPI journal article supplement (doi:10.3390/su14010224), 2021-12-26
Supplement: s1 [file s1]

Archive with 1 entries (1 files):
- sustainability-1396799-supplementary.pdf
