# Supplementary material for: The Effectiveness of Online Education in Basic Medical Sciences Courses during the COVID-19 Pandemic in Saudi Arabia: Cross-Sectional Study
Source: MDPI journal article supplement (doi:10.3390/su14010224), 2021-12-26
Supplement: s1 [file s1 › sustainability-1396799-supplementary.pdf]

## Supporting Material

### The effectiveness of online education in basic medical sciences courses during the COVID-19 Pandemic in Saudi Arabia: Cross-sectional study

Mohamed A. Alblihed <sup>\*1</sup>, Syed Moyn Aly <sup>2</sup>, Ashraf Albrakati <sup>3</sup>, Ahmed Fathy Eldehn <sup>4</sup>, Shaimaa Ahmed Awad Ali <sup>5,6</sup>, Tahani Al-Hazani <sup>7</sup>, Mohammed Hamed Albarakati <sup>8</sup>, Mohamed Abdel Daim <sup>9,10</sup>, Anas Al-sharif <sup>11</sup>, Alaa Jameel A. Albarakati <sup>12</sup> and Ehab Kotb Elmahallawy <sup>\*13</sup>

**Table S1.** The full details of the questionnaire contained twenty-nine items.

|           | Statements                                                                                                                   |
|-----------|------------------------------------------------------------------------------------------------------------------------------|
| <b>A</b>  | Have you ever used online platforms for online education before the COVID19 pandemic?                                        |
| <b>B</b>  | Does your college have its own online platform for online education?                                                         |
| <b>C</b>  | How is your experience of using electronic platforms for online education?                                                   |
| <b>1</b>  | I am satisfied with the quality of online education.                                                                         |
| <b>2</b>  | I gain knowledge more effectively during face-to-face lectures than online methods                                           |
| <b>3</b>  | I am satisfied with the ability of most faculty members to teach online effectively.                                         |
| <b>4</b>  | Most of the faculty members can interact with me during online sessions.                                                     |
| <b>5</b>  | I find it easy to ask my teachers questions during online sessions.                                                          |
| <b>6</b>  | I am satisfied with the quality of pictures, graphs and images during online education.                                      |
| <b>7</b>  | I think the online system of learning basic sciences is more useful than the traditional system.                             |
| <b>8</b>  | I think I have the skills needed to study basic sciences well during online sessions.                                        |
| <b>9</b>  | I think the online system of learning basic sciences is more enjoyable than the traditional system.                          |
| <b>10</b> | It is easy for me to use the online system to learn basic sciences.                                                          |
| <b>1</b>  | I find it easy to understand information in online education as compared to during face-to-face sessions.                    |
| <b>12</b> | My institution has facility to teach us Anatomy by 3-D models available online.                                              |
| <b>13</b> | I learn better by on-line Anatomy method than by traditional teaching of Anatomy.                                            |
| <b>14</b> | I like online system of lectures because I can re-visit the saved lectures if needed                                         |
| <b>15</b> | I like online education system because there are interactive softwares that can simulate reality.                            |
| <b>16</b> | I have been able to learn practical skills in basic sciences (lab related work) by online sessions                           |
| <b>17</b> | I am easily able to learn how to apply knowledge of basic sciences to understand diseases through online system of education |
| <b>18</b> | My institution provides me with suitable technical support if needed.                                                        |
| <b>19</b> | My institution provides me with suitable academic support if needed.                                                         |
| <b>20</b> | My institution provides me with suitable counseling services if needed.                                                      |
| <b>21</b> | My institution has provided me with clear policies for online assessment.                                                    |
| <b>22</b> | I am satisfied with the training that my institution provided me on how to use the electronic platform.                      |
| <b>23</b> | The provided training was at a suitable time.                                                                                |
| <b>24</b> | The provided training was of adequate duration.                                                                              |
| <b>25</b> | The course content during the COVID-19 pandemic is suitable for online education.                                            |
| <b>26</b> | Online education is a suitable method for Basic Science education.                                                           |
